# Supplementary material for: A mace-like heterostructural enriched injectable hydrogel composite for on-demand promotion of diabetic wound healing
Source: Royal Society of Chemistry journal article supplement (doi:10.1039/d2tb02403a), 2023-01-01
Supplement: d2tb02403a1.pdf [file d2tb02403a1.pdf]

## Supporting Information

### **Mace-like Heterostructural Enriched Injectable Hydrogel Composite for On-demand Promotion of Diabetic Wound Healing**

*Li Wang,<sup>1,2</sup> Zahid Hussain,<sup>1,2</sup> Penghui Zheng,<sup>2</sup> Yajie Zhang,<sup>2</sup> Yi Cao,<sup>2</sup> Tong Gao,<sup>2</sup>  
Zhuangzhuang Zhang,<sup>1,2</sup> Yuehu Zhang,<sup>2</sup> Renjun Pei\*<sup>1,2</sup>*

<sup>1</sup>School of Nano-Tech and Nano-Bionics, University of Science and Technology of China,  
Hefei, 230026, China.

<sup>2</sup>CAS Key Laboratory for Nano-Bio Interface, Suzhou Institute of Nano-Tech and Nano-  
Bionics, Chinese Academy of Sciences, Suzhou, 215123, China

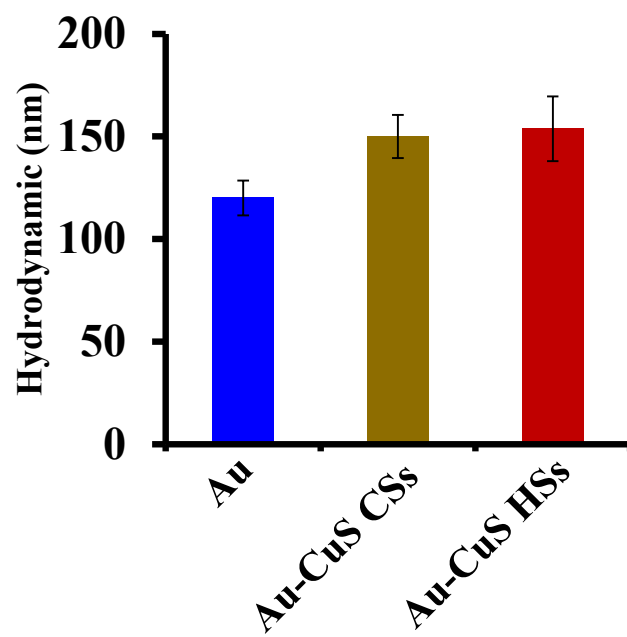

**Figure S1.** The hydrodynamic sizes of Au, Au-CuS CSs, and Au-CuS HSs in water.

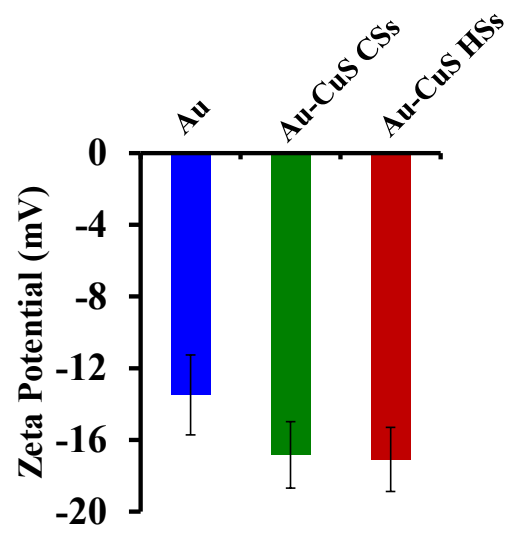

**Figure S2.** The Zeta potentials of Au, Au-CuS CSs, and Au-CuS HSs in water.

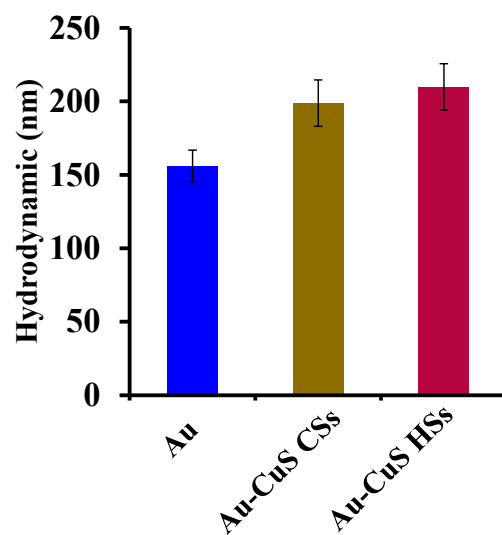

**Figure S3.** The hydrodynamic sizes of the different facets Au, Au-CuS CSs, and Au-CuS HSs in DMEM culture medium containing 10% FBS.

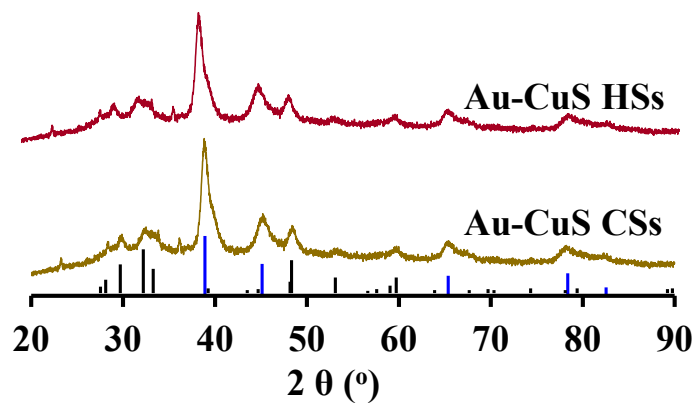

**Figure S4.** XRD pattern of Au-CuS CSs and Au-CuS HSs. The blue line represents the standard cubic phase of Au (JCPDS No. 04-0784) and the black line is for the standard covellite phase of CuS (JCPDS No. 06-0464).

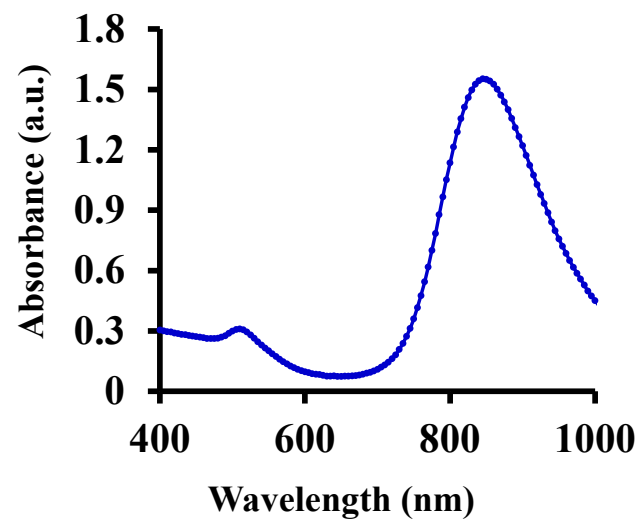

**Figure S5.** UV-Vis-NIR absorption spectra of Au NRs.

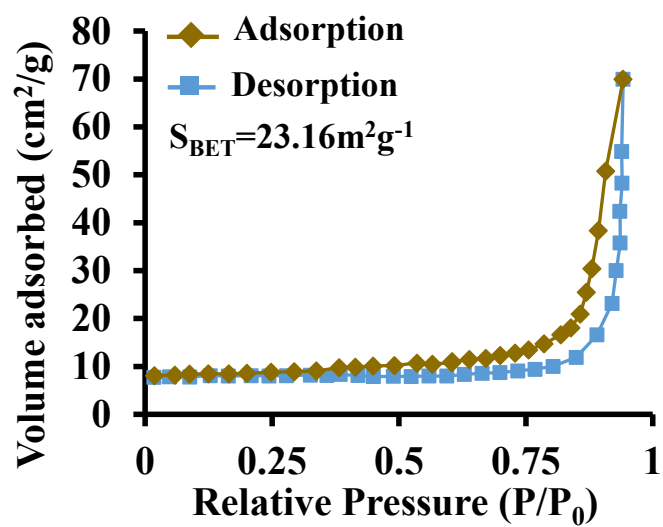

**Figure S6.** Determination of the specific surface area of Au-CuS CSs.

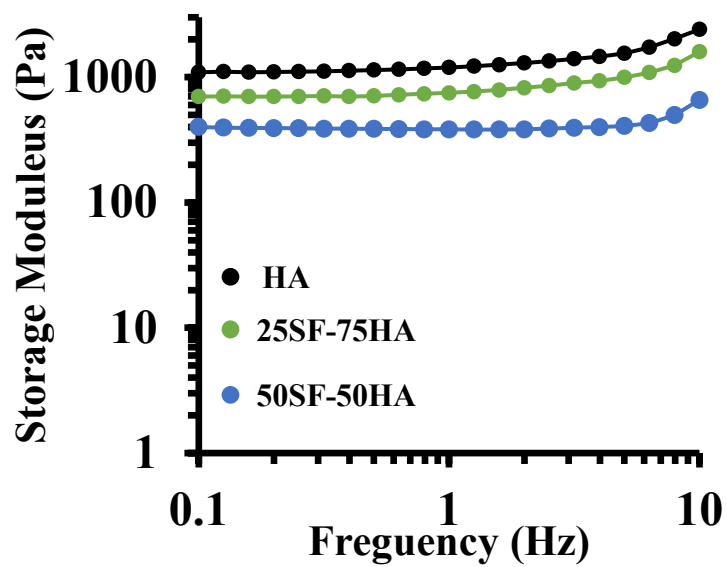

**Figure S7.** Storage modulus-strain response patterns of HA, 25SF-75HA and 50SF-50HA hydrogels.



# 1. HA

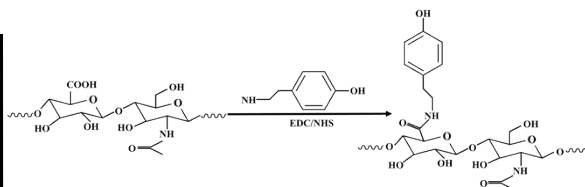

# 2. HA-Tyr

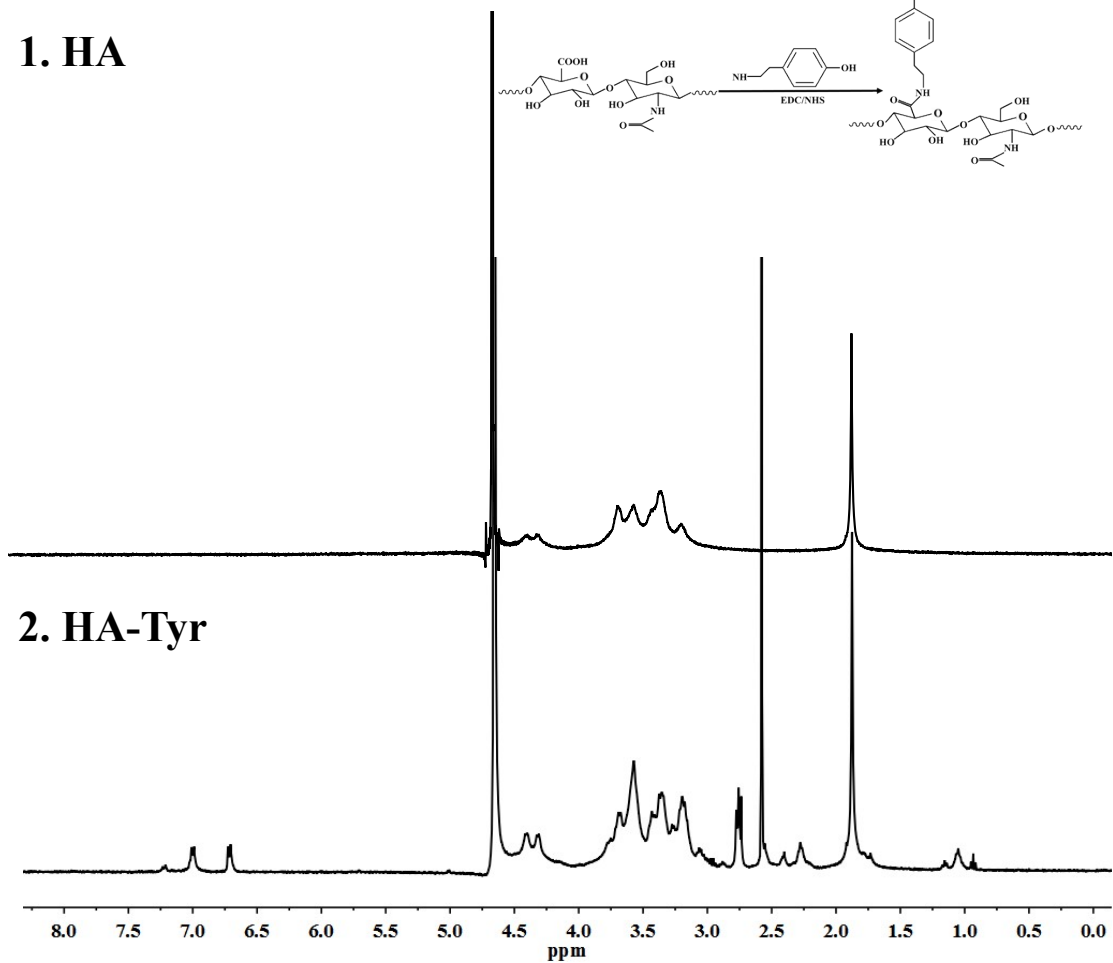

Figure S8. <sup>1</sup>H NMR of HA and HA-Tyr.

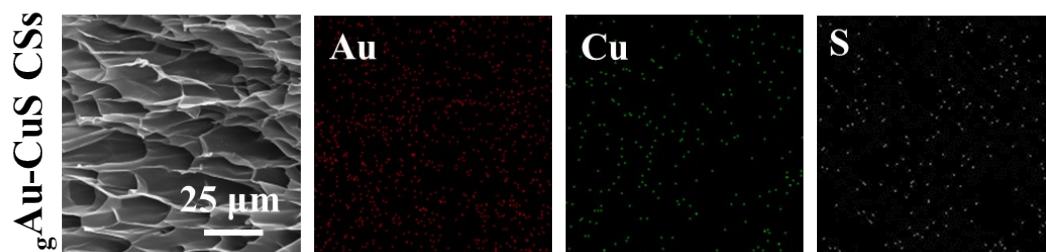

**Figure S9.** Representative SEM image and corresponding EDX elemental mappings of gAu-CuS CSs hydrogel

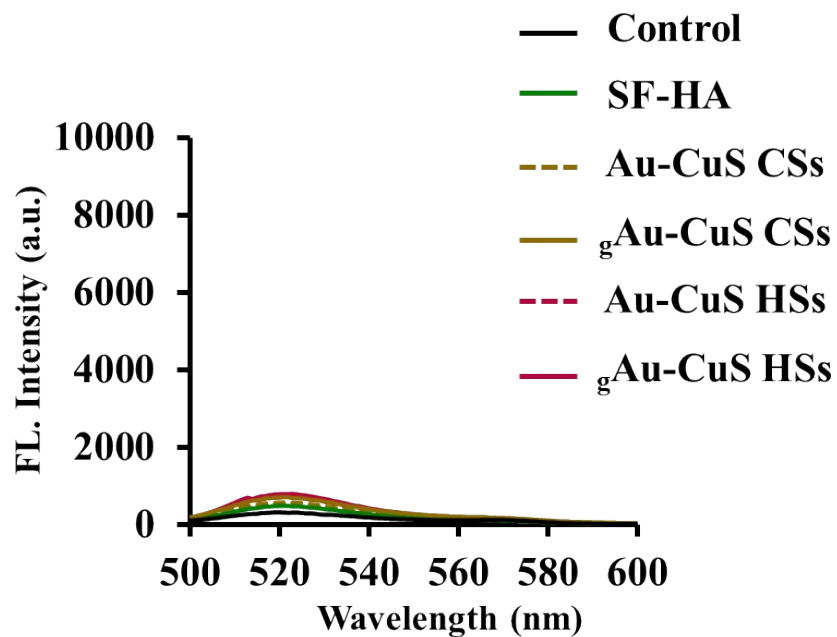

**Figure S10.** Emission spectra of DCF in PBS solution after 12 h of incubation with  $100 \mu\text{g mL}^{-1}$  gAu-CuS CSs hydrogel and gAu-CuS HSs hydrogel (equivalent to Au-CuS) without NIR laser irradiation. Excitation wavelength-455 nm.

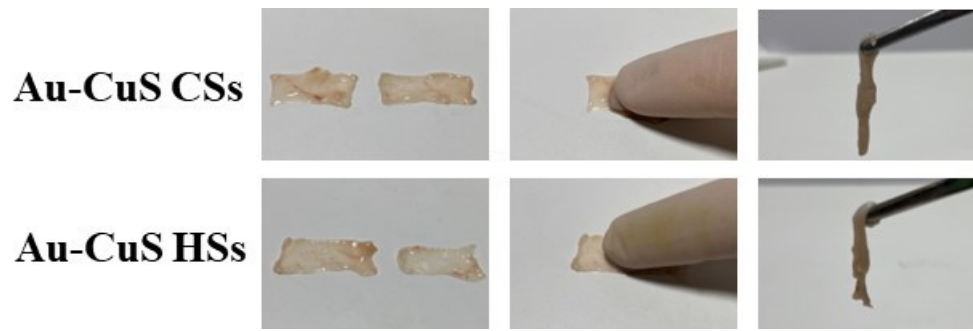

**Figure S11.** Adhesion properties of Au-CuS CSs and Au-CuS HSs on two pieces of the mouse skin.

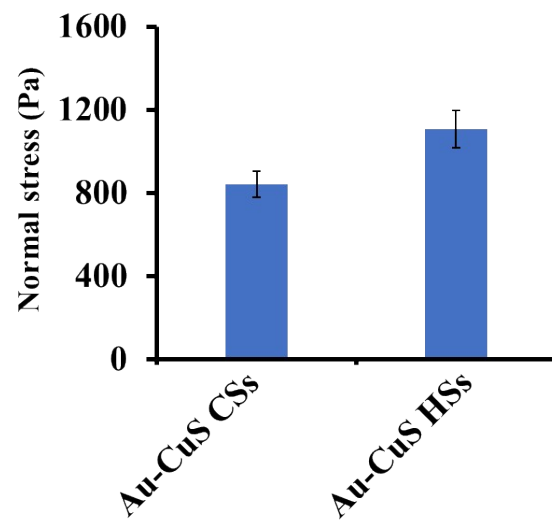

**Figure S12.** The adhesive strength of Au-CuS CSs and Au-CuS HSs toward skin tissue was evaluated via a lap-shear test.

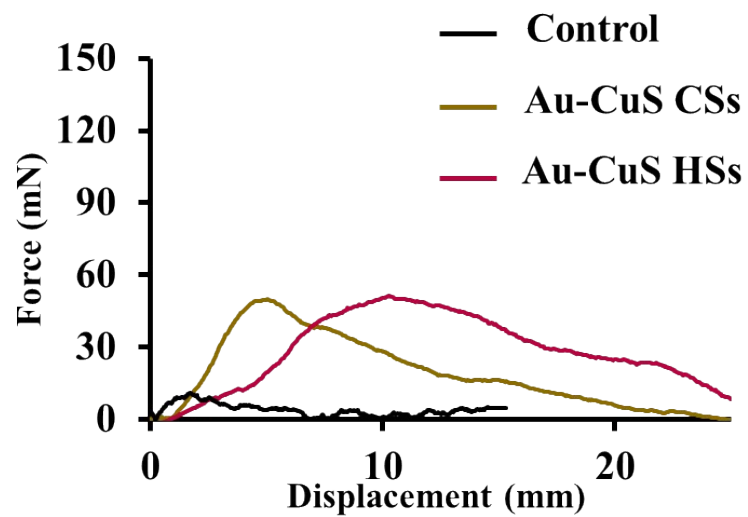

**Figure S13.** Force–displacement curves for lap joints of two mouse skins glued by Au-CuS CSs and Au-CuS HSs.

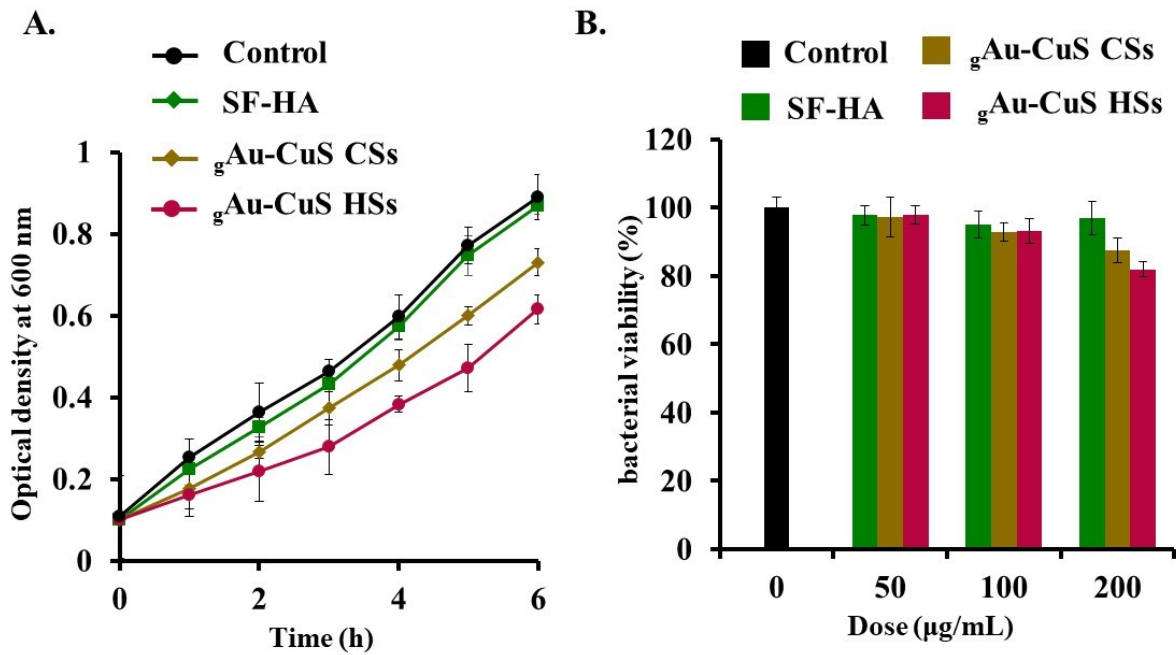

**Figure S14.** Bacterial growth curves (A) and viability (B) of *E. coli* treated with  $50 \mu\text{g mL}^{-1}$   $g$ Au-CuS CSs hydrogel and  $g$ Au-CuS HSs hydrogel (equivalent to Au-CuS) without NIR laser.

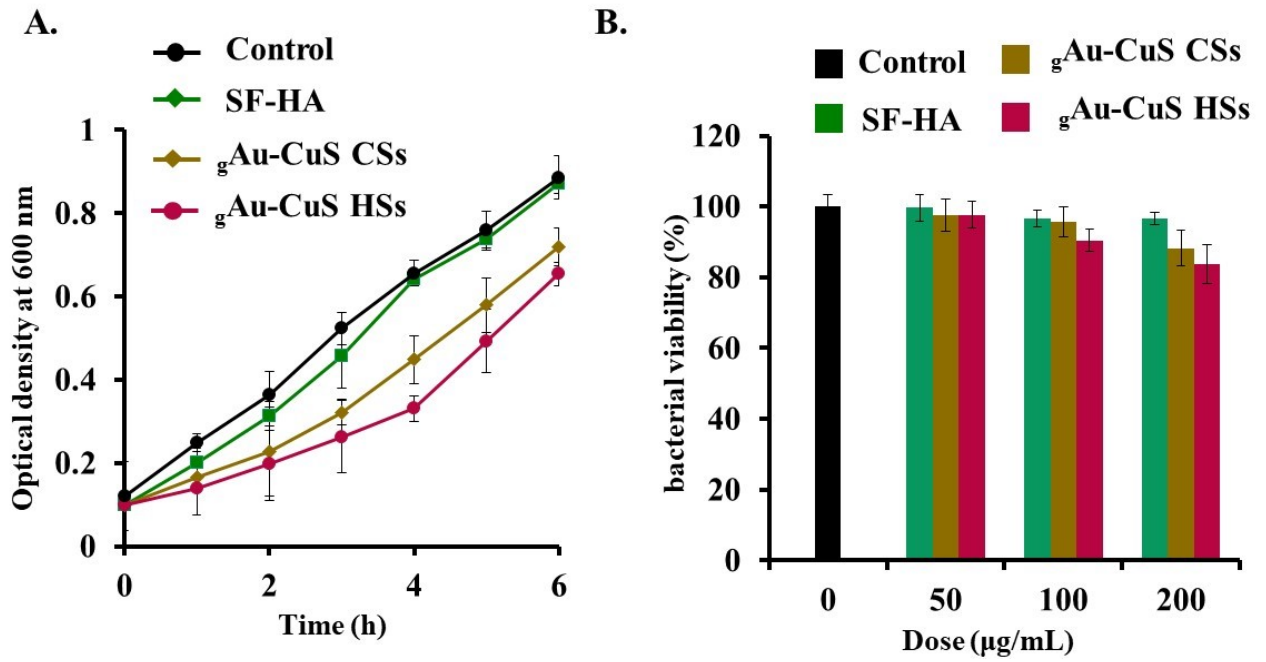

**Figure S15.** Absorbance at 600 nm of bacteria (A) and viability (B) of *S. aureus* treated with  $50 \mu\text{g mL}^{-1}$  gAu-CuS CSs hydrogel and gAu-CuS HSs hydrogel (equivalent to Au-CuS) without NIR laser.



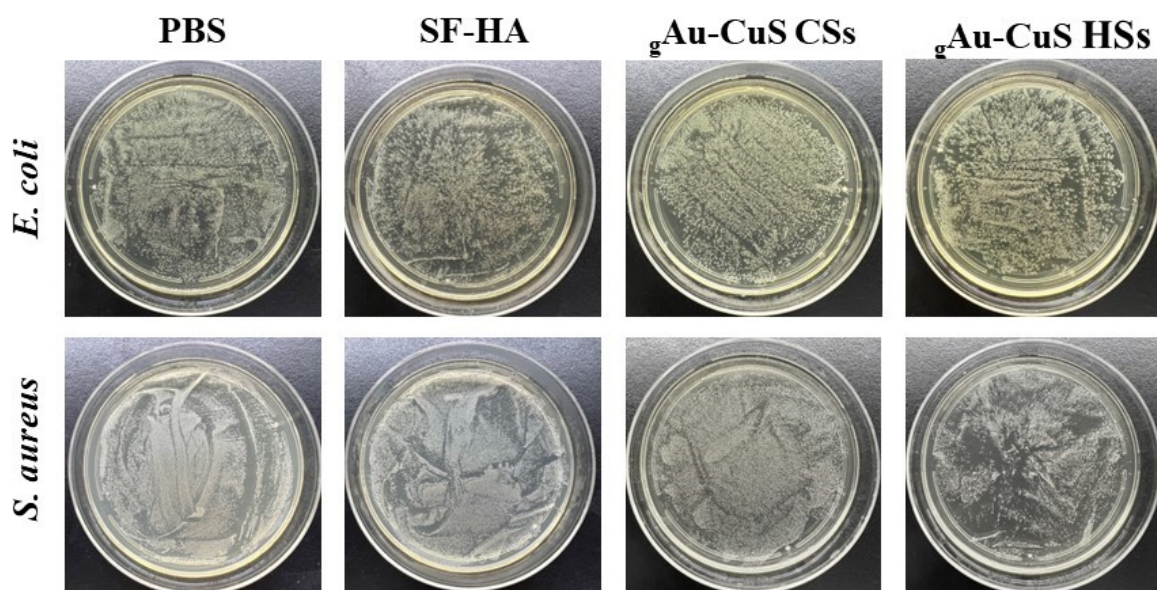

**Figure S16.** Petri dish photographs showed bacterial CFU of *E. coli* and *S. aureus* treated with  $50 \mu\text{g mL}^{-1}$   $gAu-CuS$  CSs hydrogel and  $gAu-CuS$  HSs hydrogel (equivalent to  $Au-CuS$ ) without NIR laser.

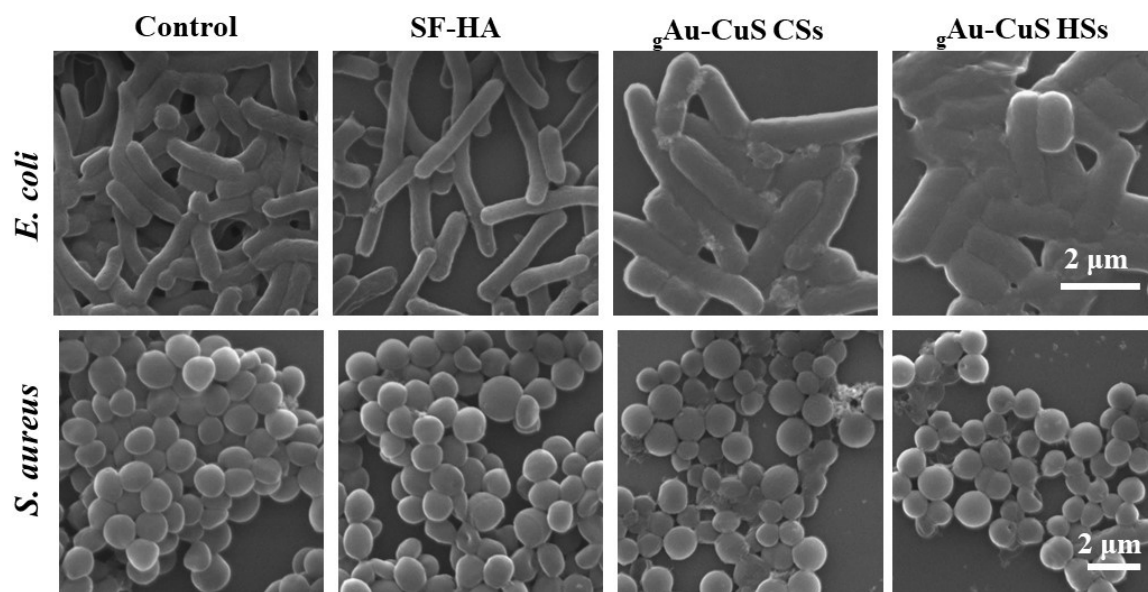

**Figure S17.** SEM images of *E. coli* and *S. aureus* were treated with  $50 \mu\text{g mL}^{-1}$  gAu-CuS CSs hydrogel and gAu-CuS HSs hydrogel (equivalent to Au-CuS) without NIR laser.

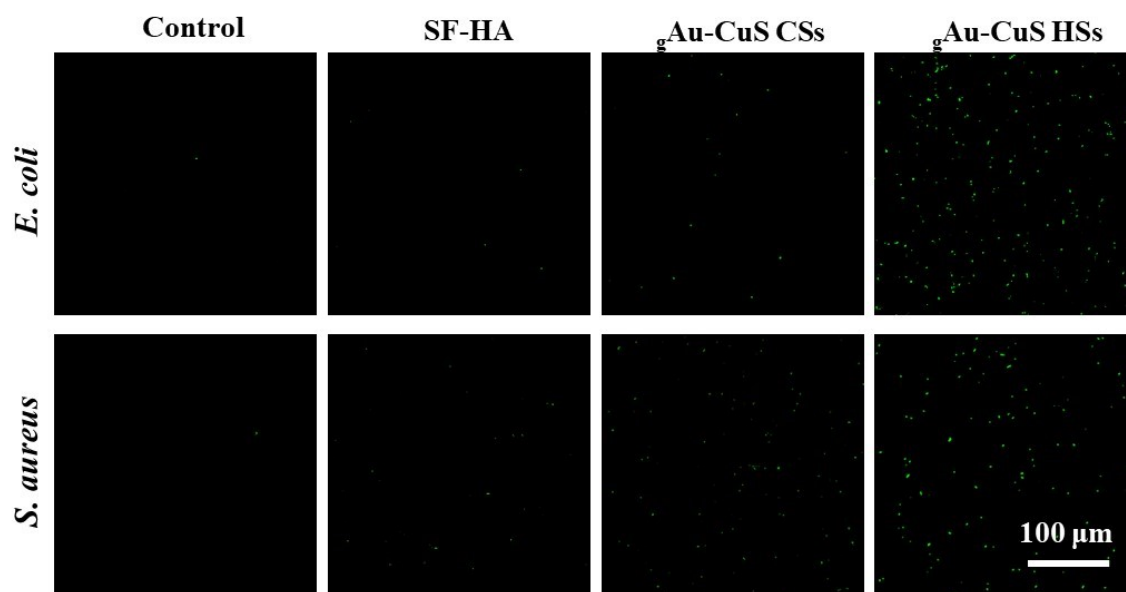

**Figure S18.** DCF fluorescence intensities of *E. coli* and *S. aureus* treated with  $50 \mu\text{g mL}^{-1}$  gAu-CuS CSs hydrogel and gAu-CuS HSs hydrogel (equivalent to Au-CuS) without NIR laser irradiation.

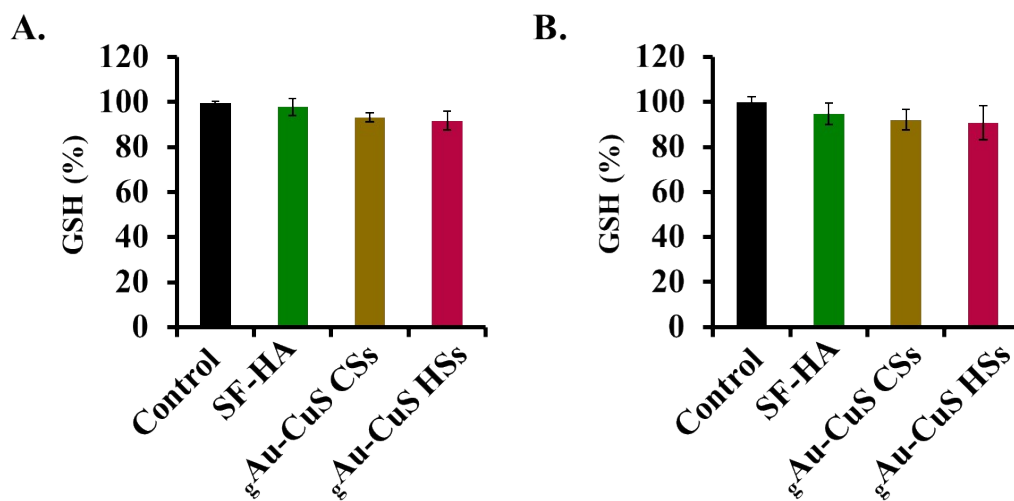

**Figure S19.** GSH levels of *E. coli* and *S. aureus* treated with  $50 \mu\text{g mL}^{-1}$  gAu-CuS CSs hydrogel and gAu-CuS HSs hydrogel (equivalent to Au-CuS) without NIR laser irradiation.

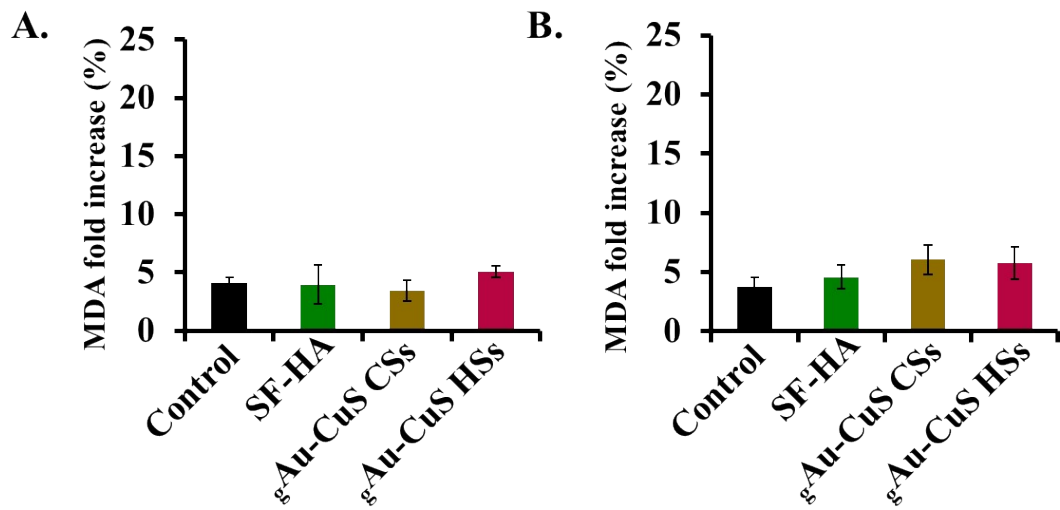

**Figure S20.** Lipid peroxidation levels of *E. coli* and *S. aureus* treated with  $50 \mu\text{g mL}^{-1}$  gAu-CuS CSs hydrogel and gAu-CuS HSs hydrogel (equivalent to Au-CuS) without NIR laser irradiation.

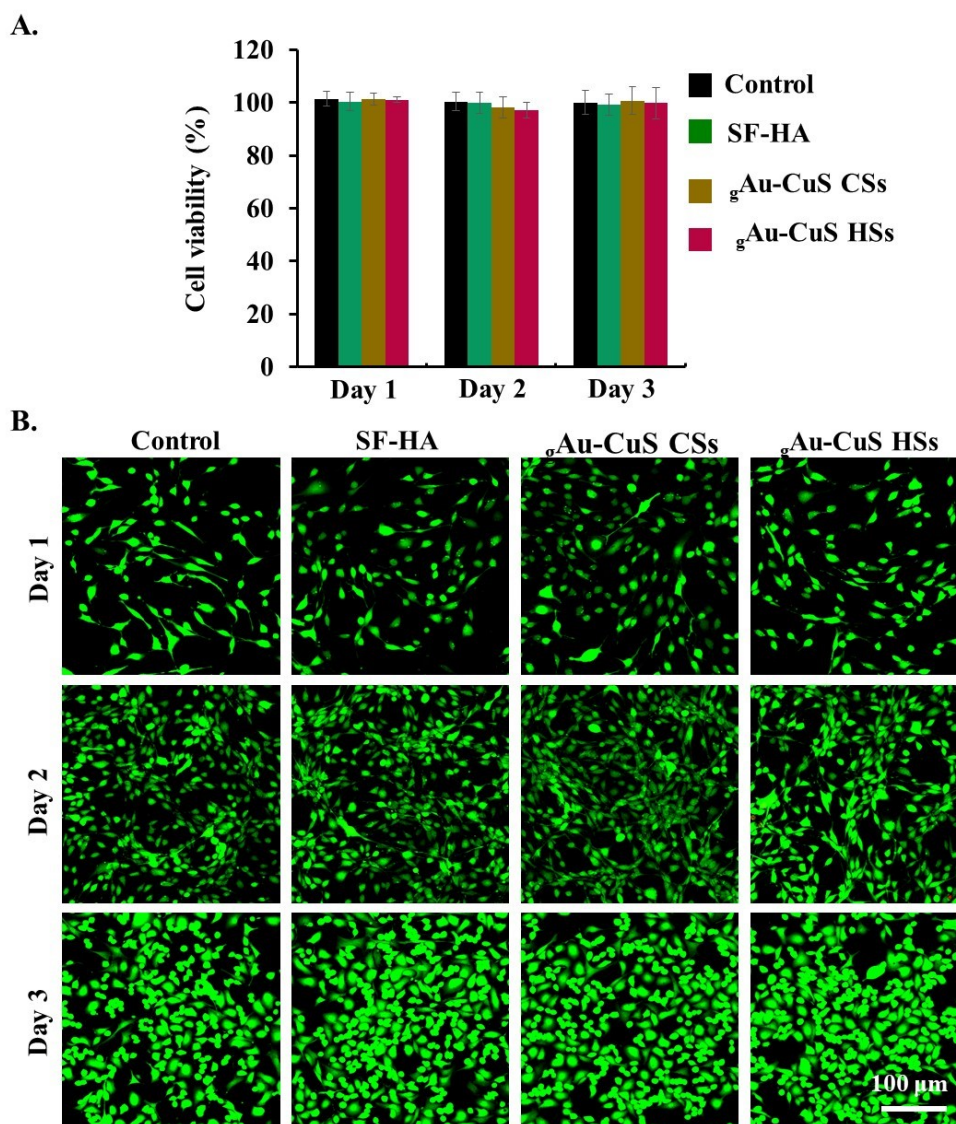

**Figure S21.** (A) Viability assessment of 3T3 cells treated with  $100 \mu g mL^{-1}$   $gAu-CuS$  CSs hydrogel and  $gAu-CuS$  HSs hydrogel (equivalent to  $Au-CuS$ ) for 24 h, 48h or 72 h without NIR laser irradiation and assessed by MTT assay. (B) Live/dead cell staining of 3T3 cells treated with  $100 \mu g mL^{-1}$   $gAu-CuS$  CSs hydrogel and  $gAu-CuS$  HSs hydrogel (equivalent to  $Au-CuS$ ) for 24 h, 48h or 72 h without NIR laser irradiation.

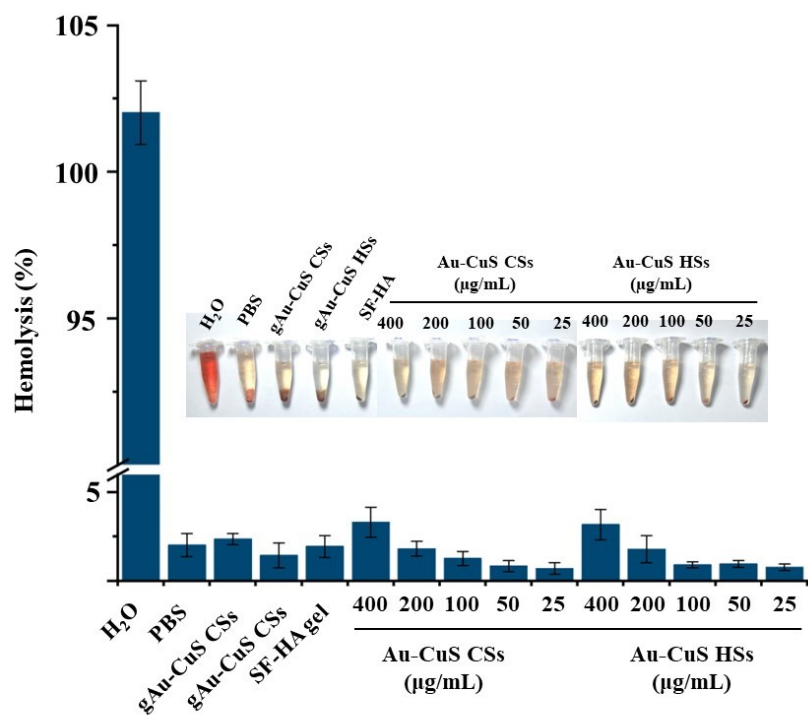

**Figure S22.** Hemolysis of gAu-CuS HSs hydrogel and different components. Hemolytic ratio of gAu-CuS CSs hydrogel, gAu-CuS HSs hydrogel, Au-CuS CSs and Au-CuS HSs (10, 20, 50, 100, 200, 400  $\mu\text{g mL}^{-1}$ ). Inset: digital photograph of hemolytic test, Error bar represent mean  $\pm$  SD,  $n=3$ .

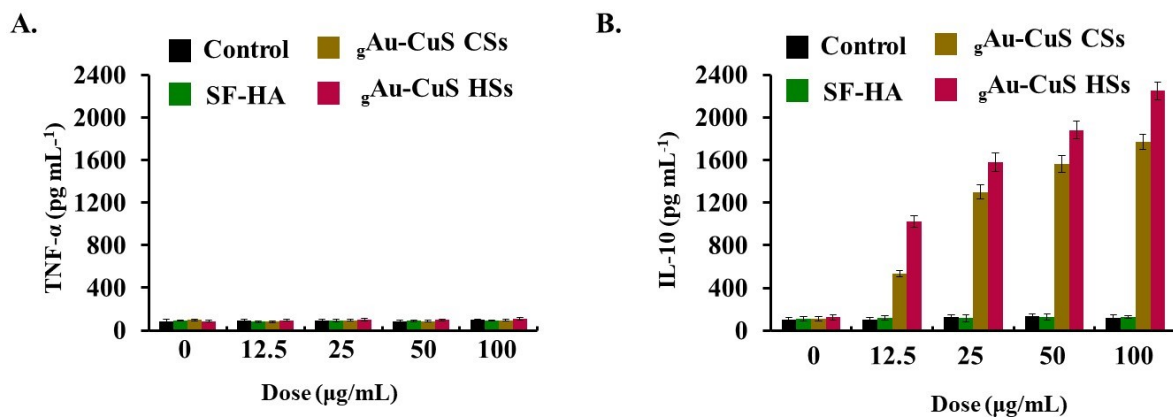

**Figure S23.** Levels of TNF- $\alpha$  (A) and IL-10 factor (B) expression in cells after RAW 264.7 was treated with different concentration of gAu-CuS CSs hydrogel and gAu-CuS HSs hydrogel (equivalent to Au-CuS) without NIR laser irradiation.



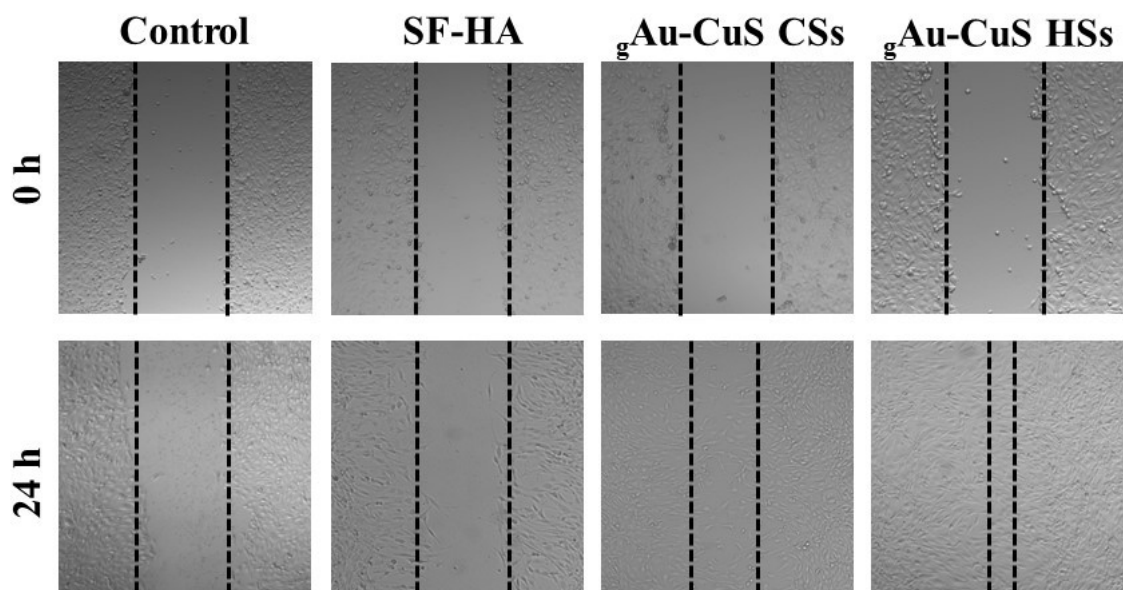

**Figure S24.** Level of cell migration after treatment with  $100 \mu\text{g mL}^{-1}$  gAu-CuS CSs hydrogel and gAu-CuS HSs hydrogel (equivalent to Au-CuS) without NIR laser irradiation.

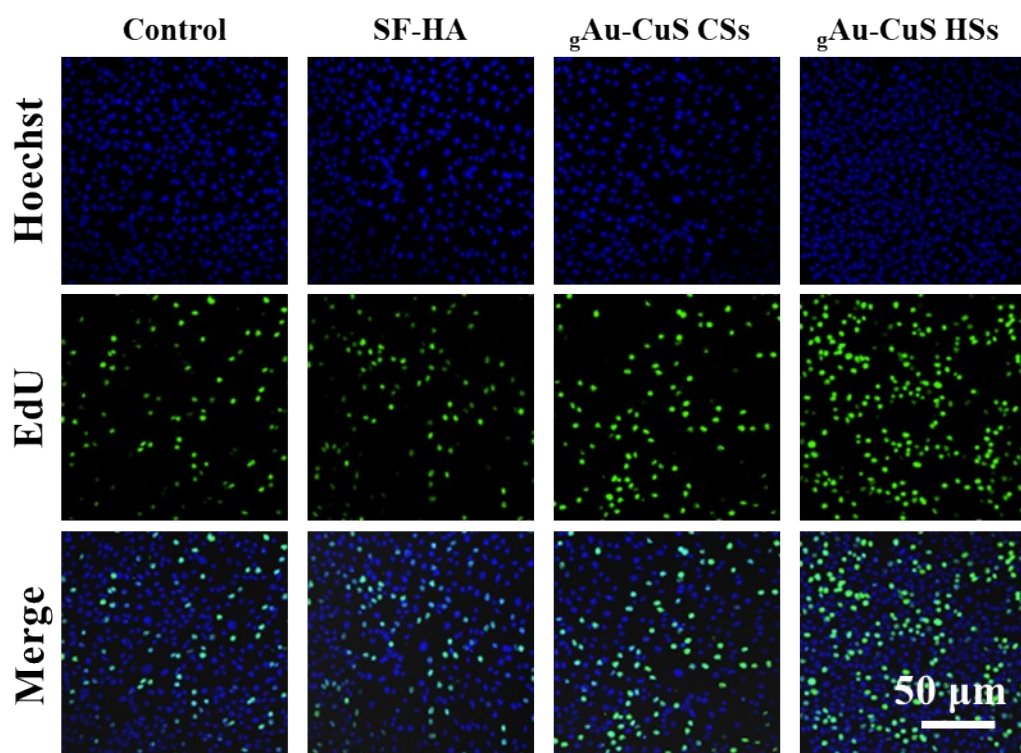

**Figure S25.** Cell proliferation after treatment with  $100 \mu\text{g mL}^{-1}$  <sup>g</sup>Au-CuS CSs hydrogel and <sup>g</sup>Au-CuS HSs hydrogel (equivalent to Au-CuS) without NIR laser irradiation.

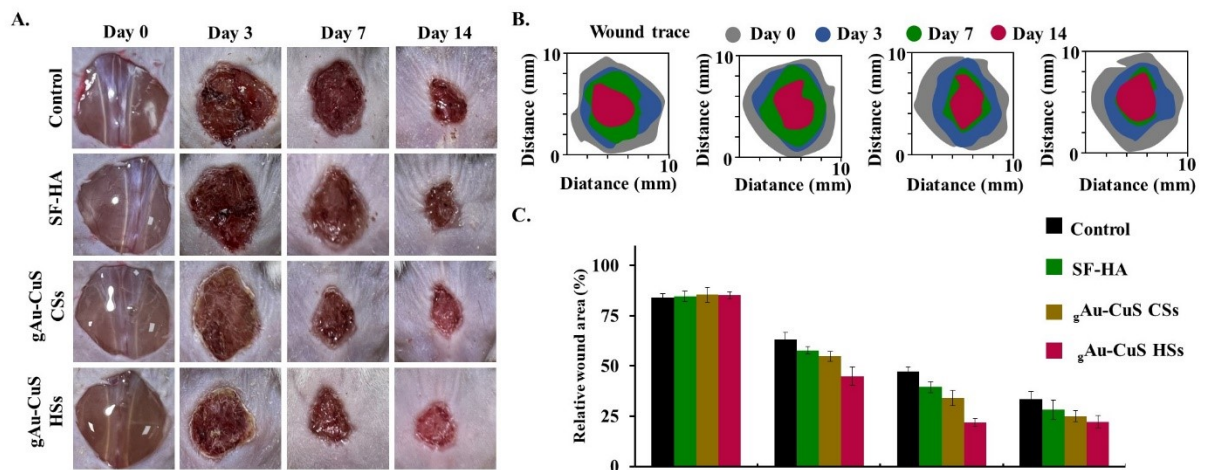

**Figure S26.** (A) Wound images of diabetic mice treated with  $100 \mu\text{g mL}^{-1}$  gAu-CuS CSs hydrogel and gAu-CuS HSs hydrogel (equivalent to Au-CuS) without NIR laser irradiation. (B) Corresponding wound closure marks for 14 d of treatment. (C) *In vivo* wound closure rates at different time points in the four groups.

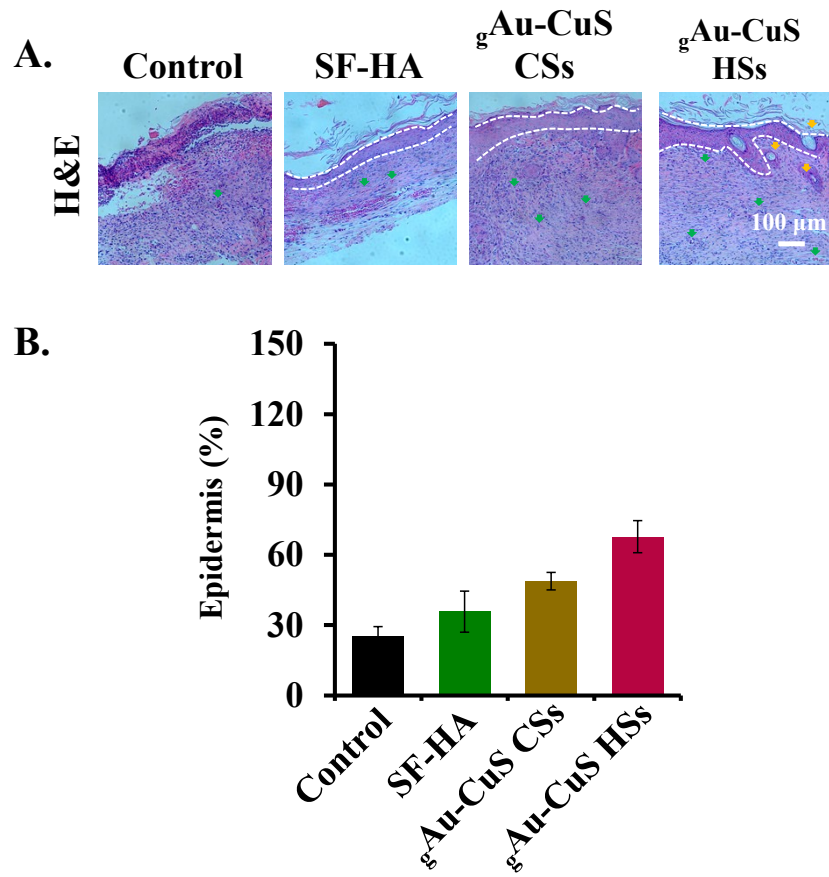

**Figure S27.** Without NIR illumination, H&E staining of wound tissue (A) and quantification of granulation tissue thickness (B) in in diabetic mice at day 14.

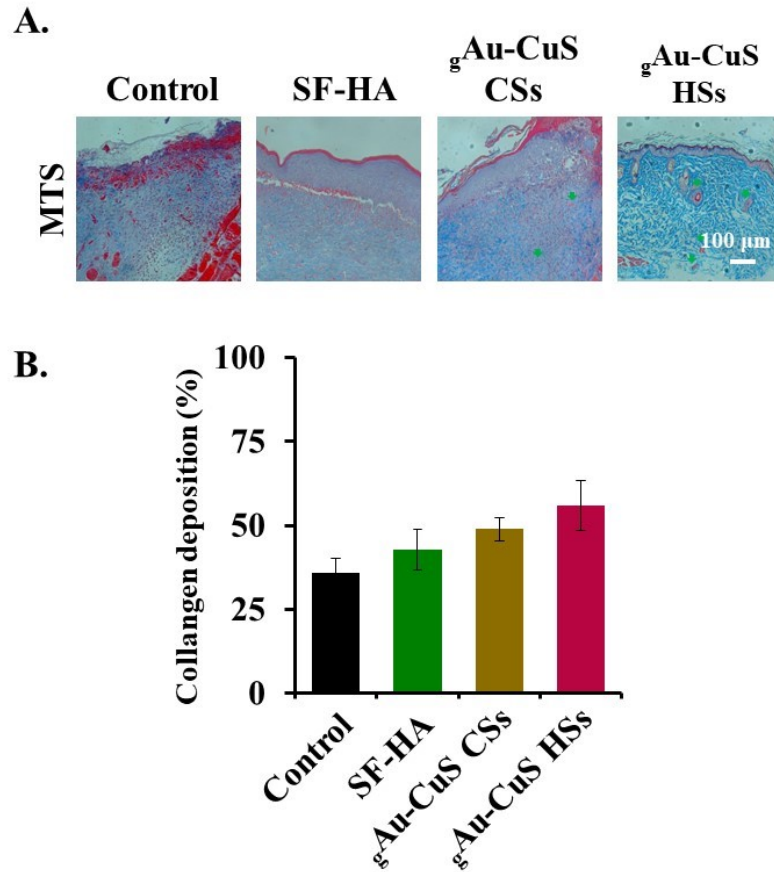

**Figure S28.** MTS staining without NIR illumination (A) and collagen quantification (B) of the wound tissue of diabetic mice at the 14 d.

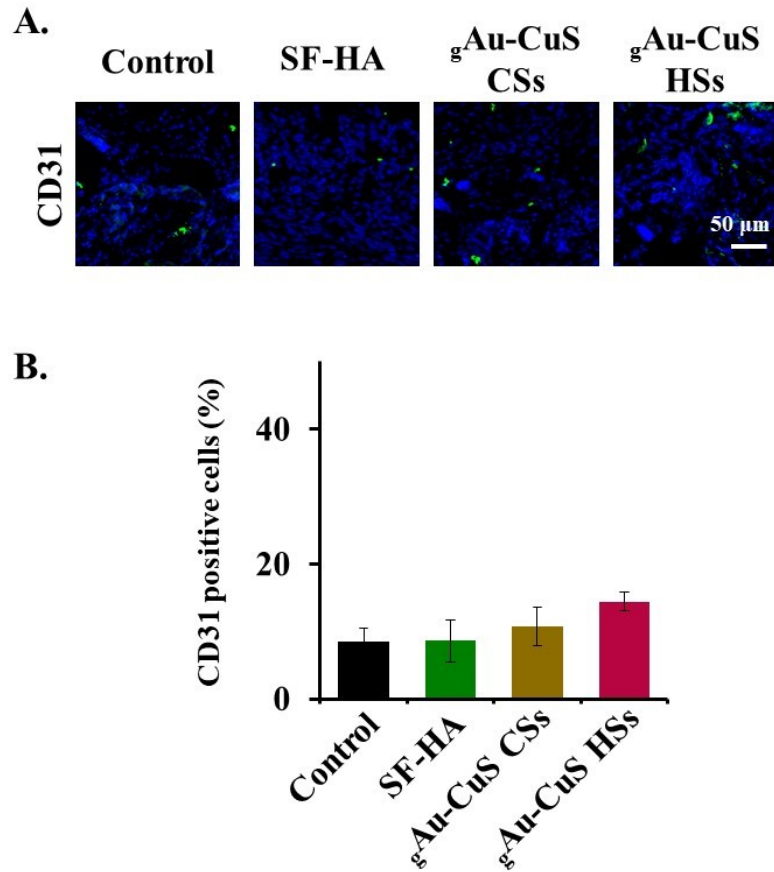

**Figure S29.** Without NIR illumination, (A) Immunofluorescence staining of CD31 (Green) and nuclei (blue) at day 14; (B) Quantitative analysis of the relative coverage area of CD31 for different groups.

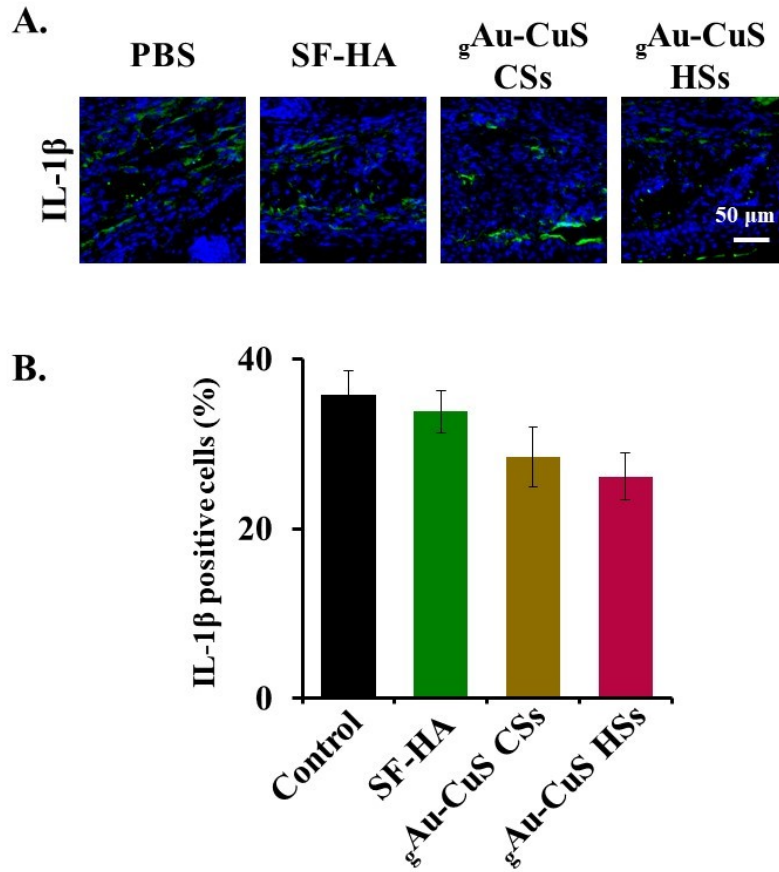

**Figure S30.** Without NIR illumination, (A) Immunofluorescence staining of IL-1 $\beta$  (Green) and nuclei (blue) at day 14; (B) Quantitative analysis of the relative coverage area of IL-1 $\beta$  for different groups.

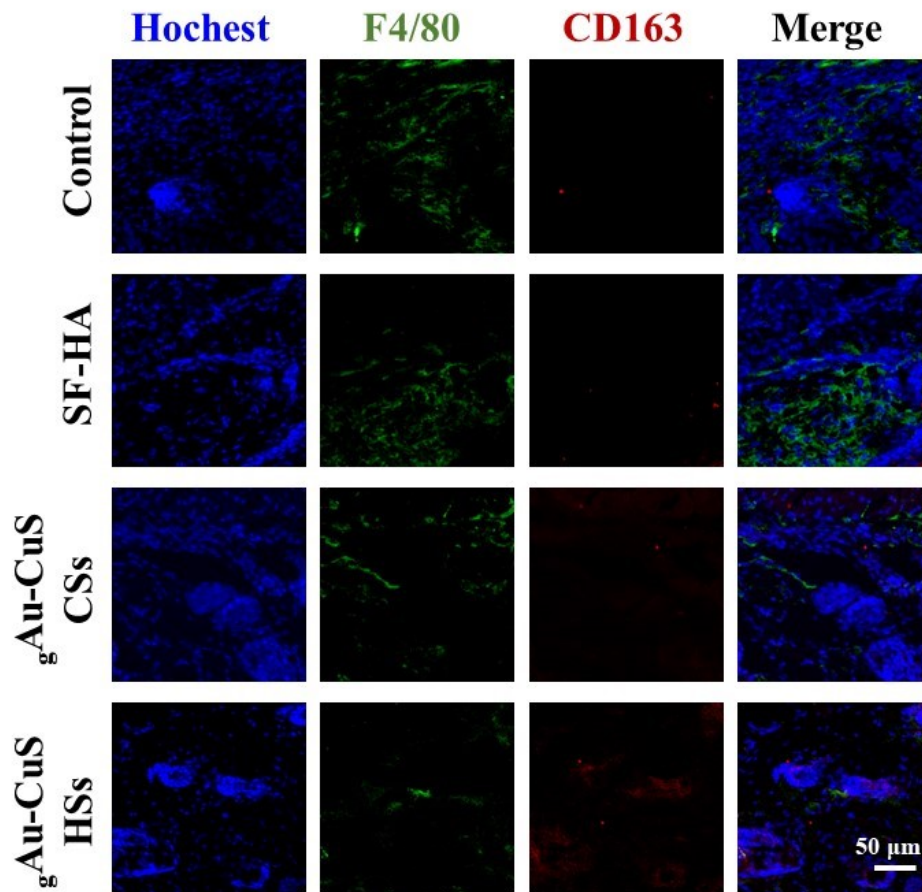

**Figure S31.** Without 808 nm laser irradiation ( $0.75 \text{ W cm}^{-2}$ , 10 min), immunofluorescence images of macrophages in wound tissue after treatment, stained with F4/80 (green) and CD163 (red). Nuclei were stained with Hoechst (blue).



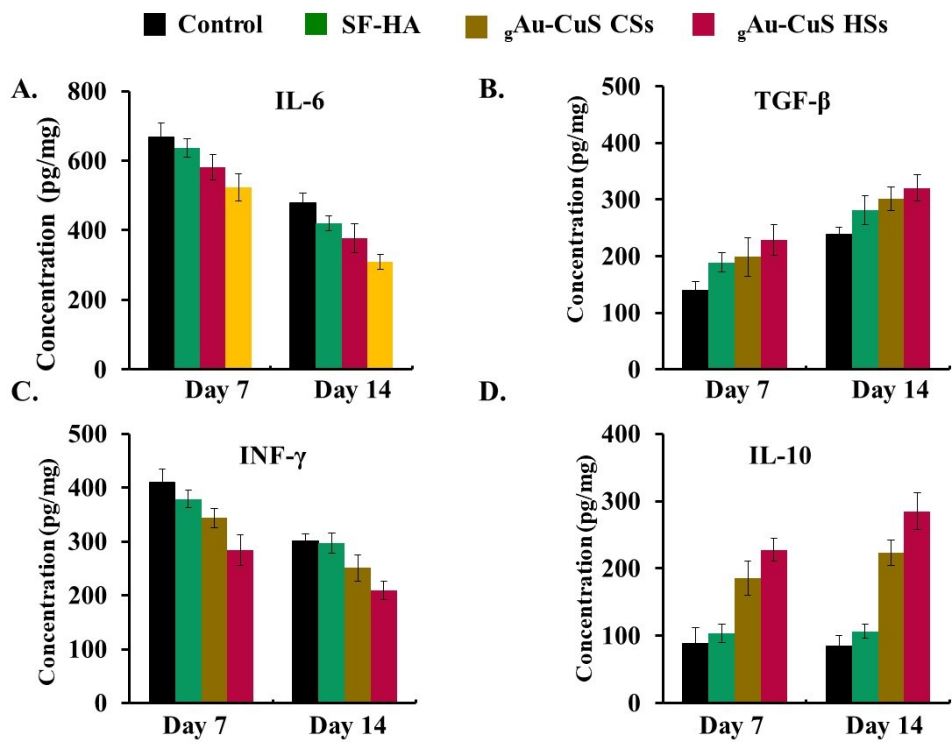

**Figure S32.** Without NIR illumination, analysis of IL-6 (A), TGF- $\beta$  (B), INF- $\gamma$  (C) and IL-10 (D) levels in wounds of diabetic mice at 7 and 14 d.

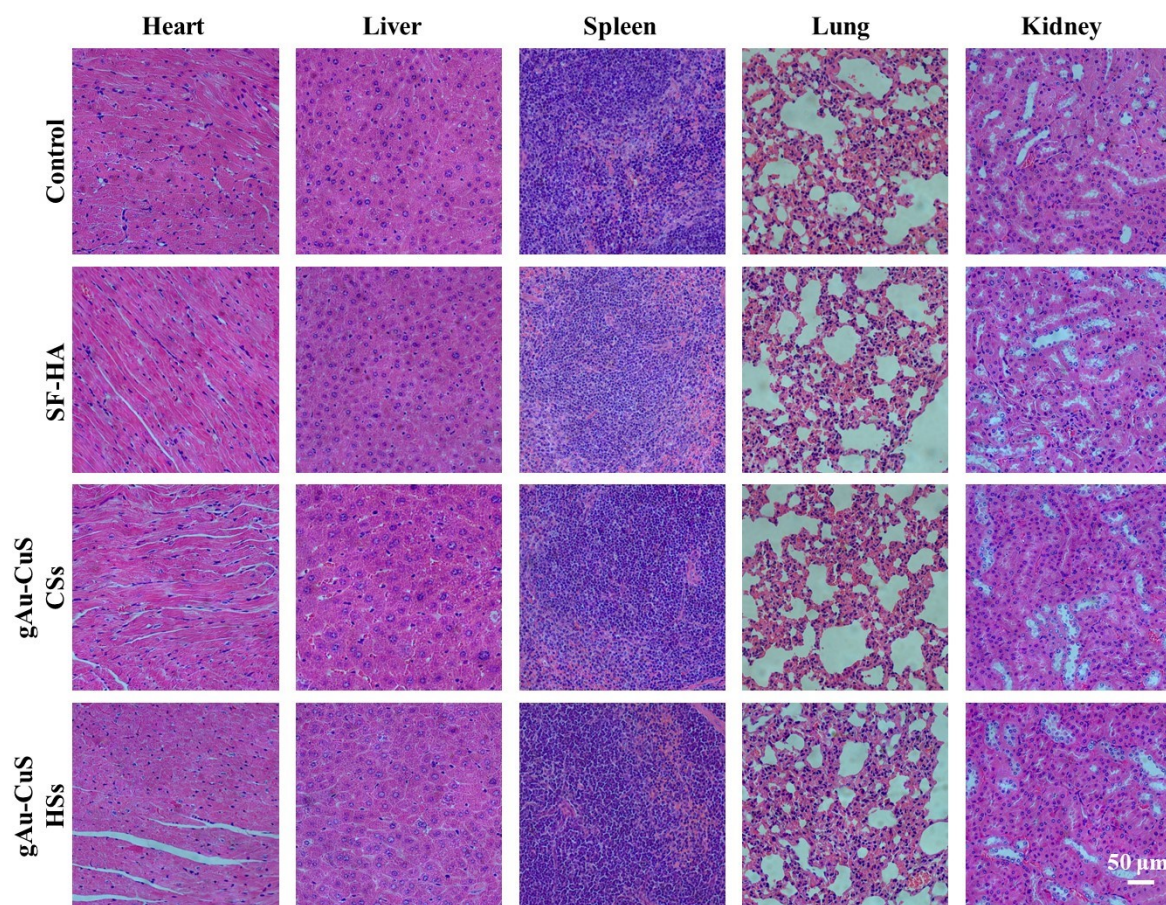

**Figure S33.** H&E-stained histological images of major organs collected at the end of treatment with 808 nm laser irradiation ( $0.75 \text{ W cm}^{-2}$ , 10 min).

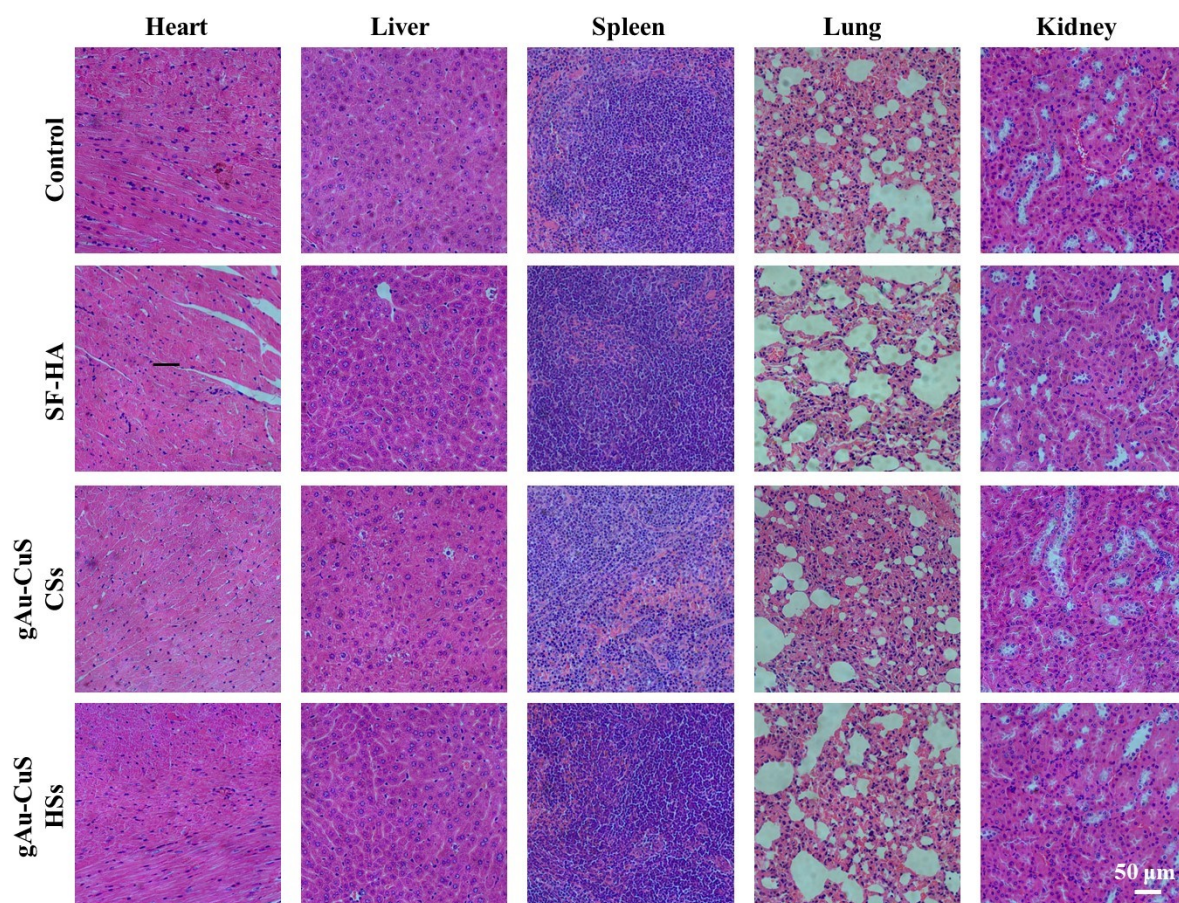

**Figure S34.** H&E-stained histological images of major organs were collected at the end of treatment without 808 nm laser irradiation.
